# Supplementary material
Source: PubMed Central journal article supplement (PMC8156162)

## Supplemental Online Content

Jfri A, Nassim D, O'Brien E, Gulliver W, Nikolakis G, Zouboulis CC. Prevalence of hidradenitis suppurativa: a systematic review and meta-regression analysis. *JAMA Dermatol*. Published online May 26, 2021.  
doi:10.1001/jamadermatol.2021.1677

eFigure 1. Funnel Plot Exhibiting Publication Bias

eFigure 2. Regression Plot Exhibiting Association Between Percentage of Females in the Study Sample and Prevalence of HS

eFigure 3. Regression Plot Exhibiting Association Between Publication Year in the Study Sample and Prevalence of HS

eFigure 4. Regression Plot Exhibiting Association Between Age of Patients and Prevalence of HS

eFigure 5. Quality of Studies as per Joanna Briggs Institute Tool for Critical Appraisal

eFigure 6. Quality of Studies and Association With Prevalence of HS

This supplemental material has been provided by the authors to give readers additional information about their work.

**eFigure 1: Funnel plot exhibiting publication bias**

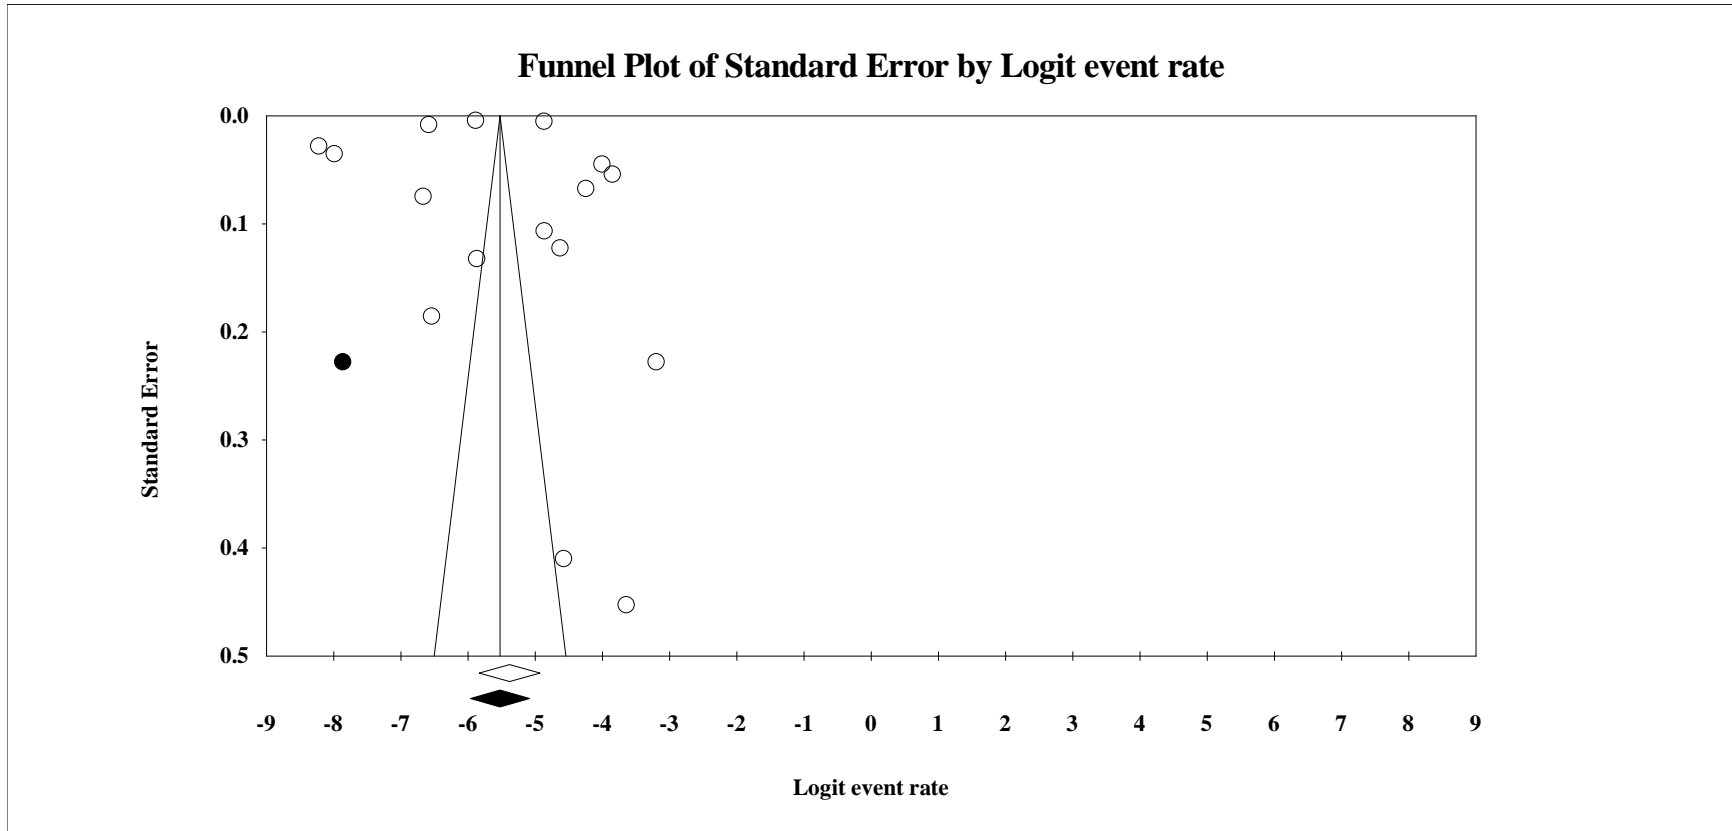

**eFigure 2: Regression plot exhibiting association between percentage of females in the study sample and prevalence of HS**

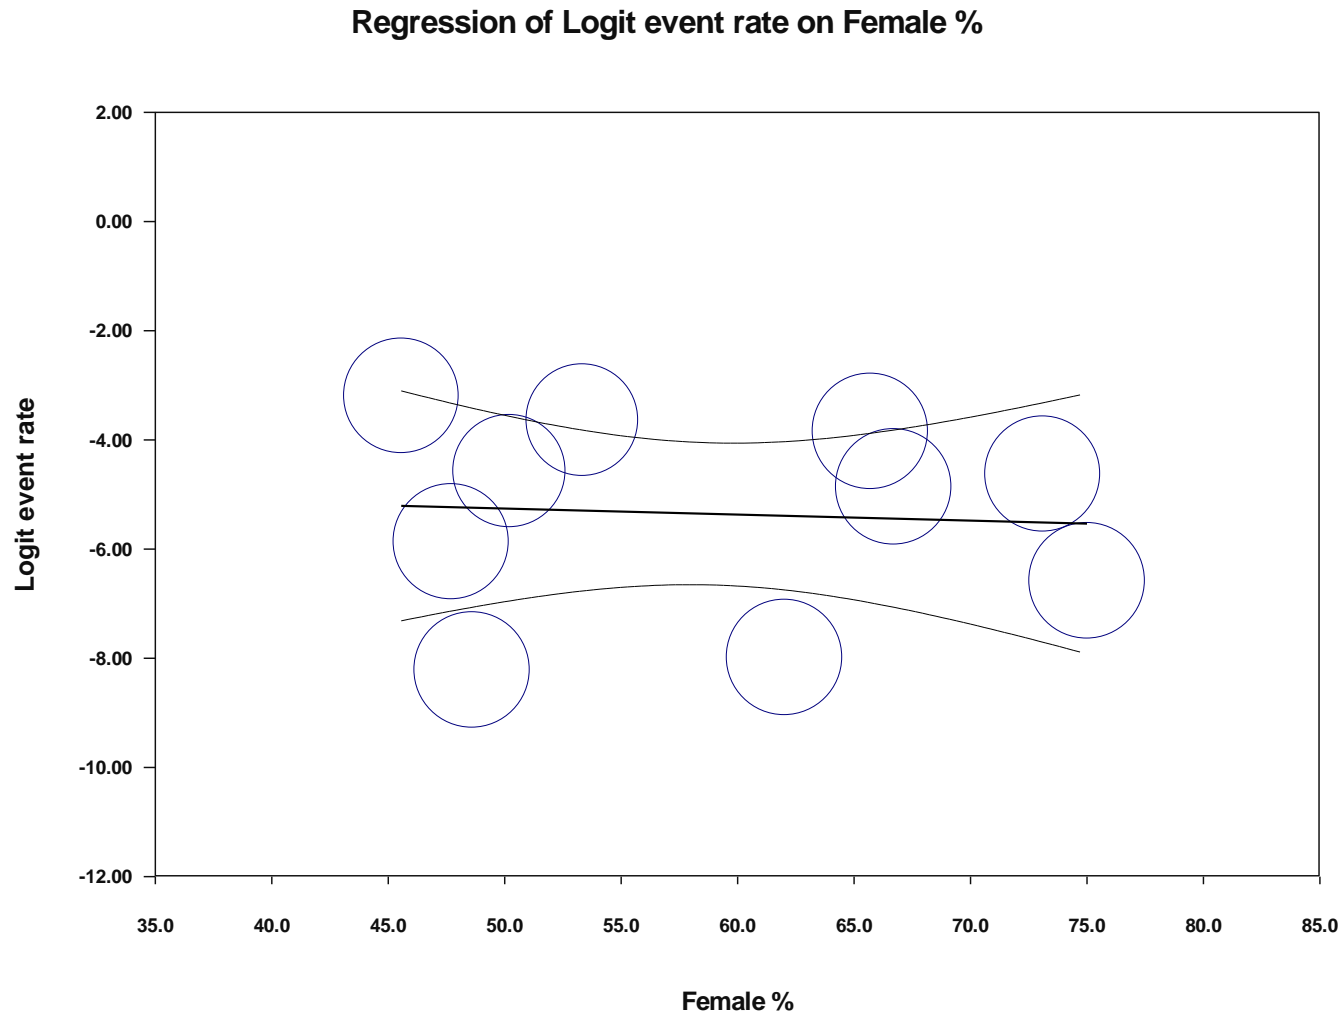

**eFigure 3: Regression plot exhibiting association between publication year in the study sample and prevalence of HS**

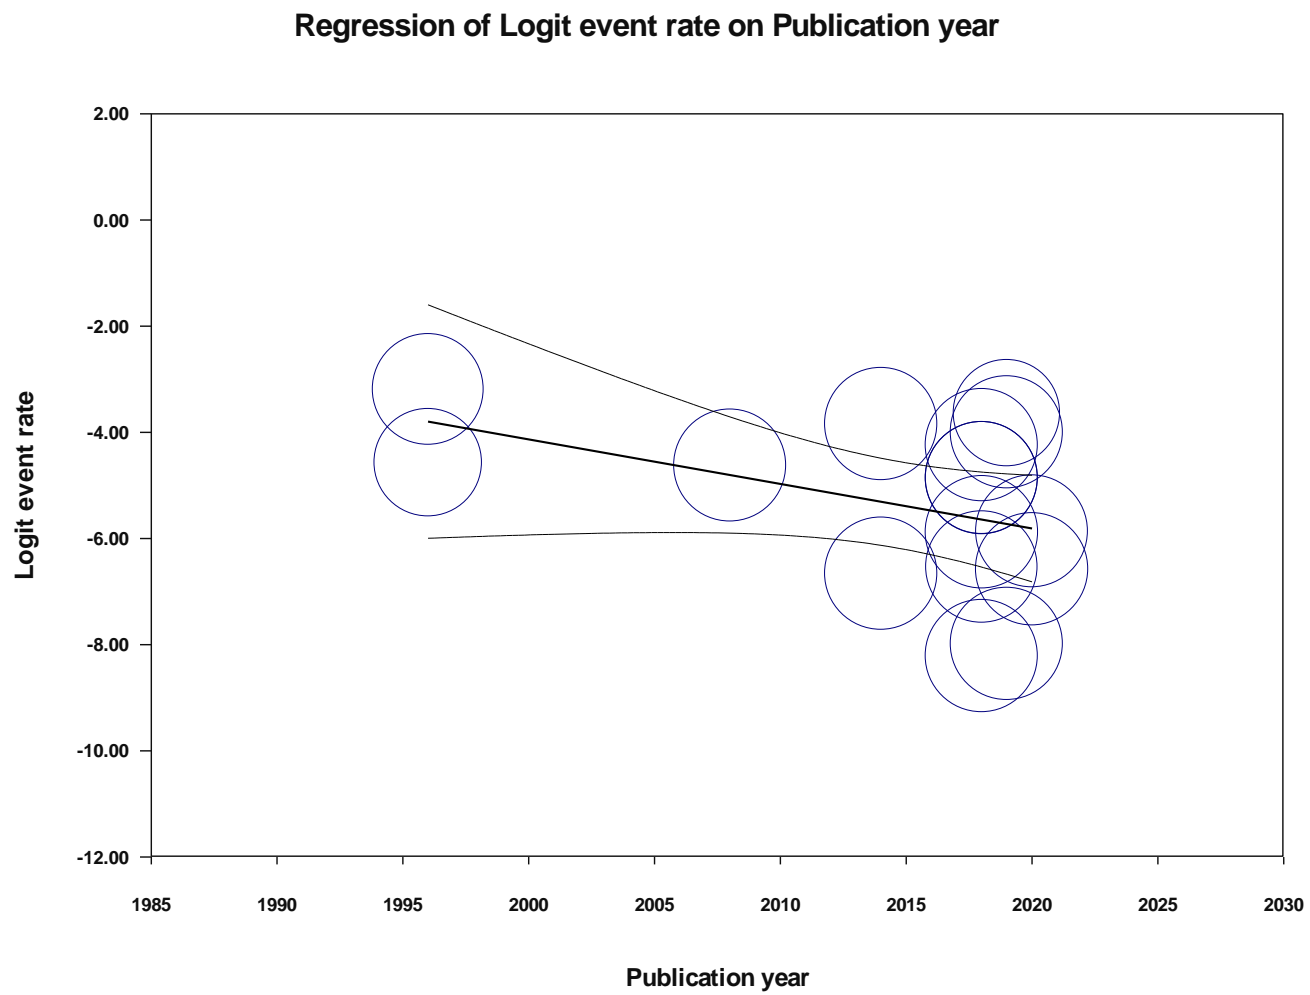

**eFigure 4: Regression plot exhibiting association between age of patients and prevalence of HS**

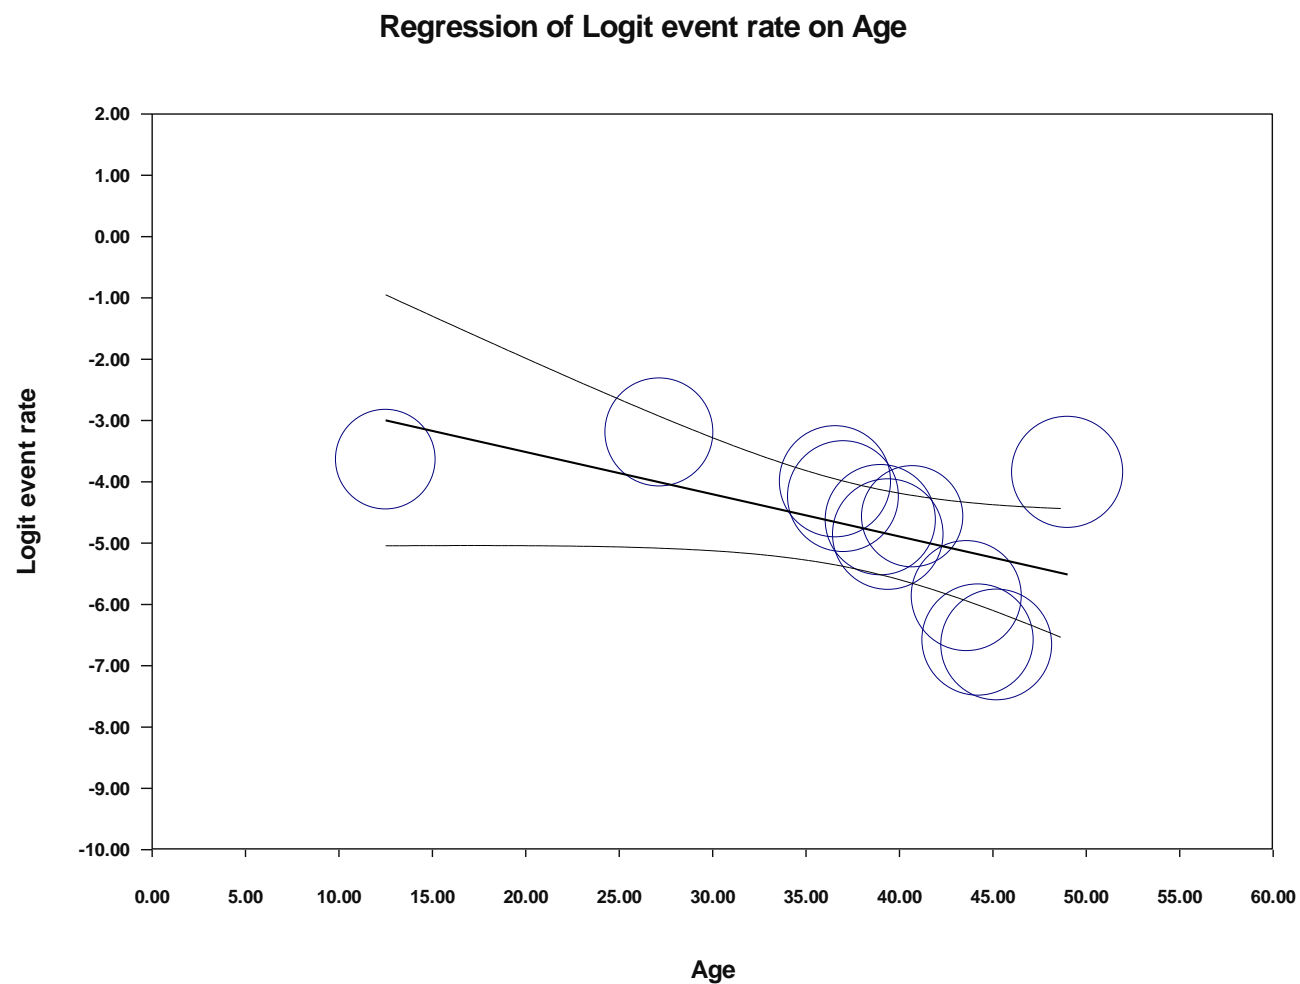

**eFigure 5: Quality of studies as per Joanna Briggs Institute tool for critical appraisal**

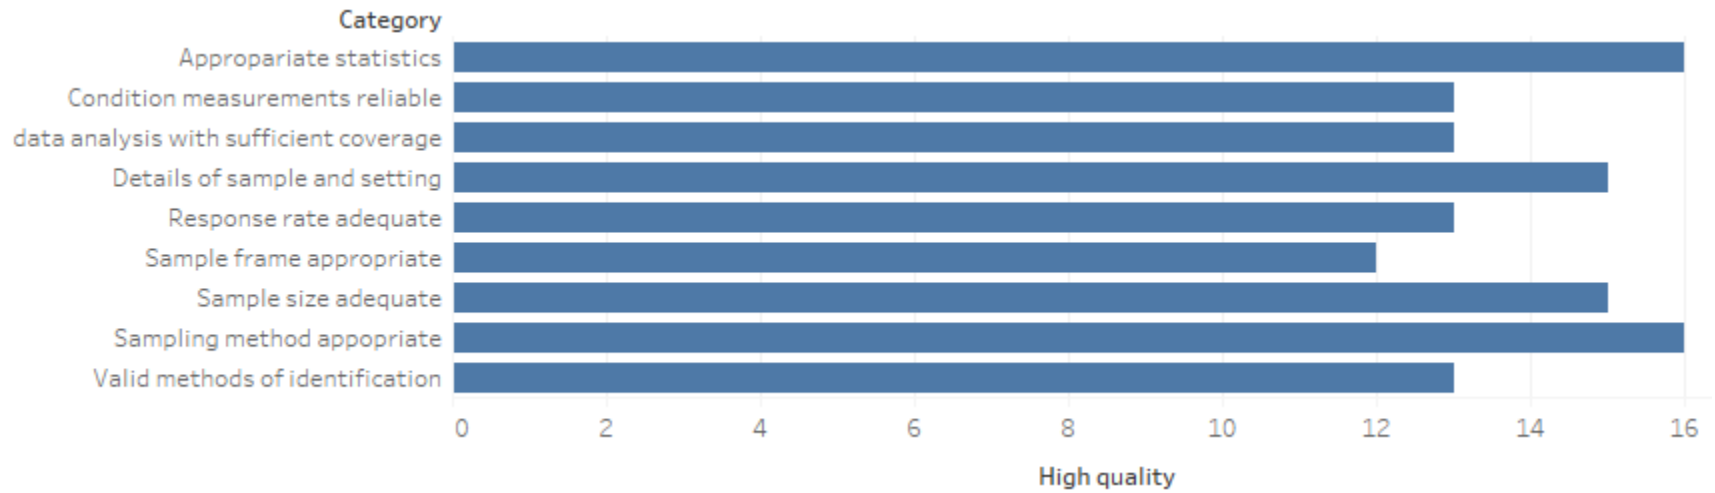

**eFigure 6: Quality of studies and association with prevalence of HS**

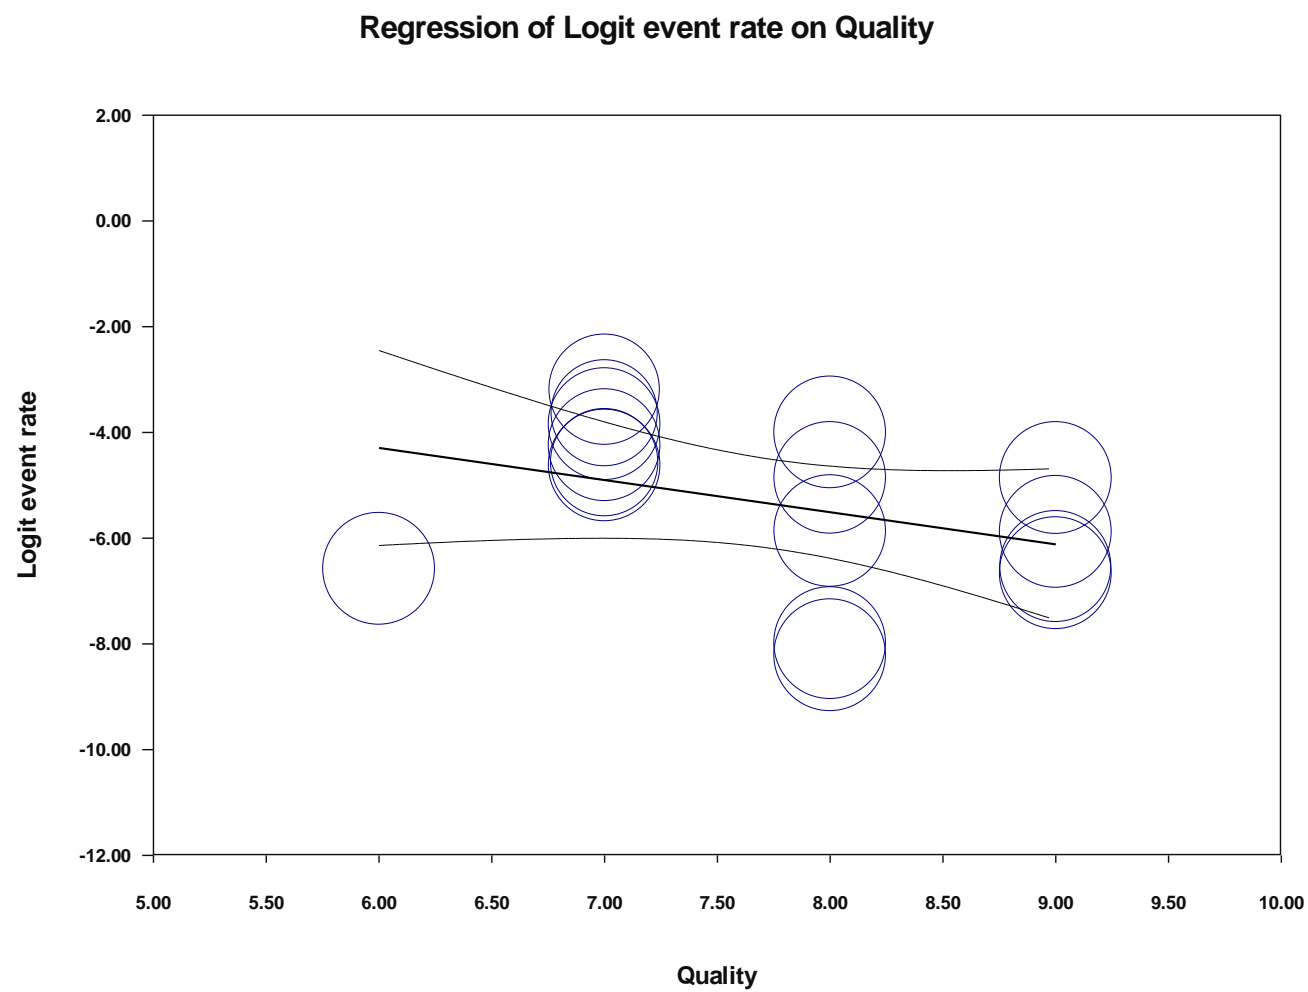

Supplement: jamadermatol-e211677-s001.pdf [file jamadermatol-e211677-s001.pdf]
